# Supplementary material
Source: PubMed Central journal article supplement (PMC6354317)
Supplement: DS_10.1369_0022155418798807.pdf [file DS_10.1369_0022155418798807.pdf]

**Refined Immunochemical Characterization in Healthy Dog Skin of  
the Epidermal Cornification Proteins, Filaggrin and  
Corneodesmosin**

**Supplemental Information**

**Table S1. Filaggrin-Derived Peptides Identified by Mass Spectrometry Analysis.**

| Annotated Sequence                              | Modifications        | Positions in FLG sequence                                          | Found in FLG 60 kDa | Found in FLG 55 kDa |
|-------------------------------------------------|----------------------|--------------------------------------------------------------------|---------------------|---------------------|
| [K].NPDDPDTADIFMHLDDLHDHK.[K]                   | 1xOxidation<br>[M12] | [47-67]                                                            | Not Found           | High                |
| [K].LAQAYDLTR.[R]                               |                      | [81-90]                                                            | High                | High                |
| [K].YAYHTQDEEDDREDEVEVEEKEER.[I]                |                      | [104-127]                                                          | High                | High                |
| [K].GANFGHSDSGSHHYQPSTQTNR.[S]                  |                      | [174-195]                                                          | High                | High                |
| [KR].QYGSQGNQGESAHGHAR.[N]                      |                      | [236-253]                                                          | High                | High                |
| [K].NWESSINQDSDSEGHTEDESER.[Q]                  |                      | [215-235]                                                          | High                | High                |
| [R].ENSSWENTDSFHR.[H]                           |                      | [307-319]                                                          | High                | High                |
| [R].GSSSTEHTSDNEGLHDSNTDFTK.[H]                 |                      | [361-383]                                                          | High                | High                |
| [K].EQRPTQDEVADR.[S]                            |                      | [395-406]                                                          | High                | High                |
| [K].HRESSVQASDSEGGSLDSETQSGSVQER.[S]            |                      | [463-491]; [1012-1040]; [1561-1589];<br>[2110-2138]; [2617-2645]   | High                | High                |
| [R].ESSVQASDSEGGSLDSETQSGSVQER.[S]              |                      | [465-491]; [1014-1040]; [1563-1589];<br>[2112-2138]; [2619-2645]   | High                | High                |
| [QR].TGHSGNSKHESSVQASDSEGGSLDSETQSGSVQER.[S]    |                      | [454-491]; [1003-1040]; [1552-1589];<br>[2101-2138]; [2608-2645]   | High                | High                |
| [R].GSSAHGSSSEHSASYFYQVAPQEHFDSAHHGSSQSSSTR.[G] |                      | [501-536]; [1050-1085]; [1599-1634];<br>[2148-2183]                | High                | High                |
| [R].HDQAHDSSRHSGSHEGQAADFGHSESGSR.[H]           |                      | [543-571]; [1092-1120]; [2190-2218]                                | High                | Not Found           |
| [R].HDQAHDSSR.[H]                               |                      | [543-551]; [1092-1100]; [1641-1649];<br>[2190-2198]; [2697-2705]   | High                | Not Found           |
| [R].HSGSHEGQAADFGHSESGSR.[H]                    |                      | [552-571]; [1101-1120]; [2199-2218]                                | High                | High                |
| [R].HSGSHEGQAADFGHSESGSRHQSSSTR.[A]             |                      | [552-578]; [1101-1127]; [2199-2225]                                | High                | Not Found           |
| [R].QQGSSSEFRPVSNR.[G]                          |                      | [589-602]; [1138-1151]; [1687-1700];<br>[2236-2249]                | High                | Not Found           |
| [R].TNHGQSQSGHGQSDTGTGR.[R]                     |                      | [653-671]; [1202-1220]; [1751-1769];<br>[2300-2318]                | Not Found           | High                |
| [R].GSSISQDSDSEGLTEDSER.[Q]                     |                      | [603-621]; [1152-1170]; [1701-1719];<br>[2250-2268]; [2757-2775]   | High                | High                |
| [R].GSSISQDSDSEGLTEDSERQYGGSGNQQGSAR.[G]        |                      | [603-635]; [1152-1184]; [1701-1733];<br>[2250-2282]; [2757-2789]   | High                | Not Found           |
| [R].QYGGSGNQQGSAR.[G]                           |                      | [622-635]; [1171-1184]; [1720-1733];<br>[2269-2282]; [2776-2789]   | High                | Not Found           |
| [R].RQGSSHGSLDTSR.[L]                           |                      | [672-685]; [1221-1234]; [1770-1783];<br>[2319-2332]                | High                | High                |
| [R].GHADSVHGR.[S]                               |                      | [698-706]; [1247-1255]; [1796-1804];<br>[2345-2353]                | High                | Not Found           |
| [R].ETQHEQSTDR.[S]                              |                      | [716-725]; [1265-1274]; [1814-1823];<br>[2363-2372]                | Not Found           | High                |
| [R].HQESSLSEGHSEDSGR.[E]                        |                      | [745-760]; [1294-1309]; [1843-1858];<br>[2392-2407]                | High                | High                |
| [R].TSRHQESSLSEGHSEDSGR.[E]                     |                      | [742-760]; [1291-1309]; [1840-1858];<br>[2389-2407]                | High                | High                |
| [R].SGSEHGPLSSGPR.[T]                           |                      | [729-741]; [1278-1290]; [1827-1839];<br>[2376-2388]                | High                | High                |
| [R].NQRGSTHGQSTRSTQLGSR.[Q]                     |                      | [775-794]; [1324-1343]; [1873-1892];<br>[2422-2441]                | High                | Not Found           |
| [R].HQESSLSEGHSEDSGREFSTTR.[G]                  |                      | [745-766]                                                          | High                | High                |
| [R].HQESSLSEGHSEDSGREFSTTRGDSGSGAR.[N]          |                      | [745-774]                                                          | Not Found           | High                |
| [R].TSRHQESSLSEGHSEDSGREFSTTRGDSGSGAR.[N]       |                      | [742-774]                                                          | High                | High                |
| [R].STQLGSR.[Q]                                 |                      | [788-794]; [1337-1343]; [1886-1892];<br>[2435-2441]                | High                | Not Found           |
| [R].WQPDSAAGDSDLSTVDR.[Q]                       |                      | [970-986]; [1519-1535]; [2575-2591]                                | High                | High                |
| [R].HQESSLSEGHSEDSGREFLTR.[G]                   |                      | [1294-1315]; [1843-1864]; [2392-2413]                              | High                | High                |
| [R].HAGSHQGGQATR.[G]                            |                      | [1381-1392]; [1423-1434]; [1465-1476];<br>[1930-1941]; [1972-1983] | High                | High                |
| [R].HAGSHQGGQATRGHGPDSAHR.[D]                   |                      | [1381-1400]; [1423-1442]; [1465-1484];<br>[1930-1949]; [1972-1991] | High                | Not Found           |
| [R].HAGSHQGGQATRGHGPDSAHRDSESSTR.[E]            |                      | [1423-1449]; [1972-1998]                                           | High                | Not Found           |
| [R].HDQAHDSSRHSGSHEGQAADLGHSESGSR.[H]           |                      | [1641-1669]; [2697-2725]                                           | High                | Not Found           |
| [R].HSGSHEGQAADLGHSESGSR.[H]                    |                      | [1650-1669]; [2706-2725]                                           | High                | High                |
| [R].HSGSHEGQAADLGHSESGSRHQSSSTR.[A]             |                      | [1650-1676]; [2706-2732]                                           | High                | High                |
| [R].GHPDSAAGDSDLSTVDR.[Q]                       |                      | [2068-2084]                                                        | High                | High                |
| [R].GSSAHGSSSEHSASYFYQVAPQEHFDSAHHGSSQSSSTR.[G] |                      | [2655-2690]                                                        | High                | High                |
| [R].QQGSSSEFRPVSNR.[G]                          |                      | [2743-2756]                                                        | High                | High                |
| [R].TNHGQSQSGHGQSDPGIGR.[R]                     |                      | [2807-2825]                                                        | High                | High                |

Detailed information (q values, scores, posterior error probabilities, ranks and confidences Mascot, theoretical MH+ [Da], DeltaM [ppm] for each sample, etc.) is available on request. In green, identified peptides with FDR < 1%.
